# Supplementary material for: Predictors and triggers of incivility within healthcare teams: a systematic review of the literature
Source: PubMed Central journal article supplement (PMC7282335; doi:10.1136/bmjopen-2019-035471), 2020-06-07
Supplement: bmjopen-2019-035471supp001.pdf [file bmjopen-2019-035471supp001.pdf]

Additional Material, Table 1: Search strategy used on Medline

| <b>Step 1: Search in a mesh term and title and abstract</b>                                       |                              |                                                                                                                                                                                                                                                                                                                                                                                             |
|---------------------------------------------------------------------------------------------------|------------------------------|---------------------------------------------------------------------------------------------------------------------------------------------------------------------------------------------------------------------------------------------------------------------------------------------------------------------------------------------------------------------------------------------|
| <b>Concept of interest</b>                                                                        |                              | <b>Settings of interest</b>                                                                                                                                                                                                                                                                                                                                                                 |
| <i>MeSH Term</i>                                                                                  | <i>Combined with</i>         | <i>At least one of the following terms in the Title or Abstract</i>                                                                                                                                                                                                                                                                                                                         |
| incivility                                                                                        | ("and")                      | hospital<br>operating room<br>operating theatre<br>Surgery<br>intensive care unit<br>ICU<br>medical team<br>physician<br>doctor<br>nurse<br>anesthetist<br>anesthesiologist<br>anesthesia<br>emergency department<br>peri-operative<br>obstetrics<br>gynecology<br>CRNA<br>pediatrician<br>surgeon<br>resident<br>medical student<br>internal medicine<br>palliative<br>otorhinolaryngology |
| <b>Step 2: Search in title and abstract</b>                                                       |                              |                                                                                                                                                                                                                                                                                                                                                                                             |
| <b>Concept of interest</b>                                                                        |                              | <b>Settings of interest</b>                                                                                                                                                                                                                                                                                                                                                                 |
| <i>At least one of the following terms in the Title or Abstract</i>                               | <i>Combined with ("and")</i> | <i>At least one of the following terms in the Title or Abstract</i>                                                                                                                                                                                                                                                                                                                         |
| incivility<br>rudeness<br>disruptive behavior<br>unprofessional behavior<br>interpersonal tension |                              | hospital<br>operating room<br>operating theatre<br>Surgery<br>intensive care unit<br>ICU<br>medical team                                                                                                                                                                                                                                                                                    |

## Additional Material, Table 1: Search strategy used on Medline

physician  
doctor  
nurse  
anesthetist  
anesthesiologist  
anesthesia  
emergency department  
peri-operative  
obstetrics  
gynecology  
CRNA  
pediatrician  
surgeon  
resident  
medical student  
internal medicine  
palliative  
otorhinolaryngology

---
