# Supplementary material for: Predictors and triggers of incivility within healthcare teams: a systematic review of the literature
Source: PubMed Central journal article supplement (PMC7282335; doi:10.1136/bmjopen-2019-035471), 2020-06-07
Supplement: bmjopen-2019-035471supp002.pdf [file bmjopen-2019-035471supp002.pdf]

Additional material, Table 2: details of MERSQI scores

| Author                                | design | sampling                    |                            | type of data | Validity of instrument    |                |                                        | Data analysis          |                   | Types of outcome measured                  |                          |                  | Total score |                                    |
|---------------------------------------|--------|-----------------------------|----------------------------|--------------|---------------------------|----------------|----------------------------------------|------------------------|-------------------|--------------------------------------------|--------------------------|------------------|-------------|------------------------------------|
|                                       |        | <i>Institutions studied</i> | <i>Response rate score</i> |              | <i>Internal structure</i> | <i>Content</i> | <i>Relationship to other variables</i> | <i>Appropriateness</i> | <i>Complexity</i> | <i>Satisfaction, attitudes, perception</i> | <i>Knowledge, skills</i> | <i>Behaviors</i> |             | <i>Patient/health care outcome</i> |
| Addison and Luparell (2014)           | 1      | 1                           | 0.5                        | 1            | 0                         | 1              | 0                                      | 1                      | 1                 | 1                                          | 0                        | 0                | 0           | <b>7.5</b>                         |
| Alkaabi and Wong (2019)               | 1      | 1.5                         | 0.5                        | 1            | 1                         | 1              | 1                                      | 1                      | 2                 | 1                                          | 0                        | 0                | 0           | <b>11</b>                          |
| Alshehry et al. (2019)                | 1      | 1                           | 1.0                        | 1            | 1                         | 1              | 1                                      | 1                      | 2                 | 1                                          | 0                        | 0                | 0           | <b>11</b>                          |
| Arslan Yürümezoğlu and Kocaman (2019) | 1      | 1                           | 1.0                        | 1            | 1                         | 1              | 1                                      | 1                      | 2                 | 1                                          | 0                        | 0                | 0           | <b>11</b>                          |
| Bae et al. (2016)                     | 1      | 1.5                         | 0.5                        | 1            | 1                         | 1              | 0                                      | 1                      | 2                 | 1                                          | 0                        | 0                | 0           | <b>10</b>                          |
| Bansal (2014)                         | 1      | 0.5                         | 0.5                        | 1            | 1                         | 1              | 0                                      | 1                      | 1                 | 1                                          | 0                        | 0                | 0           | <b>8</b>                           |
| Berman-Kishony and Shvarts (2015)     | 1      | 0.5                         | 0.5                        | 1            | 0                         | 1              | 1                                      | 1                      | 2                 | 1                                          | 0                        | 0                | 0           | <b>9</b>                           |
| Birks et al. (2017)                   | 1      | 1.5                         | 0.5                        | 1            | 1                         | 1              | 0                                      | 1                      | 2                 | 1                                          | 0                        | 0                | 0           | <b>10</b>                          |
| Bradley et al. (2015)                 | 1      | 1.5                         | 0.5                        | 1            | 0                         | 0              | 0                                      | 1                      | 1                 | 1                                          | 0                        | 0                | 0           | <b>7</b>                           |
| Brewer et al. (2013)                  | 1      | 1.5                         | 1.0                        | 1            | 1                         | 1              | 0                                      | 1                      | 1                 | 1                                          | 0                        | 0                | 0           | <b>9.5</b>                         |
| Budden et al. (2017)                  | 1      | 1.5                         | 0.5                        | 1            | 1                         | 1              | 0                                      | 1                      | 2                 | 1                                          | 0                        | 0                | 0           | <b>10</b>                          |
| Budin et al. (2013)                   | 1      | 1.5                         | 1.0                        | 1            | 1                         | 1              | 1                                      | 0                      | 2                 | 1                                          | 0                        | 0                | 0           | <b>10.5</b>                        |
| Chang et al. (2019)                   | 1      | 1.5                         | 1.5                        | 1            | 1                         | 1              | 1                                      | 1                      | 2                 | 1                                          | 0                        | 0                | 0           | <b>12</b>                          |
| Elhoseny and Adel (2016)              | 1      | 0.5                         | 1.0                        | 1            | 0                         | 0              | 0                                      | 1                      | 1                 | 1                                          | 0                        | 0                | 0           | <b>6.5</b>                         |
| Elmblad et al. (2014)                 | 1      | 1.5                         | 0.5                        | 1            | 1                         | 1              | 1                                      | 1                      | 2                 | 1                                          | 0                        | 0                | 0           | <b>11</b>                          |

Additional material, Table 2: details of MERSQI scores

|                                |   |     |     |   |   |   |   |   |   |   |   |   |   |            |
|--------------------------------|---|-----|-----|---|---|---|---|---|---|---|---|---|---|------------|
| Finlayson et al. (2013)        | 1 | 1.5 | 0.5 | 3 | 0 | 1 | 1 | 1 | 2 | 0 | 0 | 2 | 0 | <b>13</b>  |
| Goettler et al. (2011)         | 1 | 0.5 | 1.5 | 1 | 0 | 1 | 0 | 1 | 2 | 1 | 0 | 0 | 0 | <b>9</b>   |
| Hamblin et al. (2016)          | 1 | 1.5 | 1.5 | 1 | 0 | 1 | 0 | 1 | 2 | 1 | 0 | 0 | 0 | <b>10</b>  |
| Heslin et al. (2019)           | 1 | 0.5 | 1.5 | 3 | 1 | 1 | 1 | 1 | 2 | 1 | 0 | 1 | 0 | <b>14</b>  |
| Heydari et al. (2015)          | 1 | 1.5 | 1.5 | 1 | 1 | 1 | 0 | 0 | 2 | 1 | 0 | 0 | 0 | <b>10</b>  |
| Kaiser (2017)                  | 1 | 0.5 | 0.5 | 1 | 1 | 1 | 1 | 1 | 2 | 1 | 0 | 0 | 0 | <b>10</b>  |
| Keller et al. (2018)           | 1 | 1.5 | 1.5 | 1 | 1 | 1 | 1 | 1 | 2 | 1 | 0 | 0 | 0 | <b>12</b>  |
| Keller et al. (2019)           | 1 | 1   | 1.5 | 3 | 1 | 0 | 1 | 1 | 2 | 1 | 0 | 1 | 0 | <b>13</b>  |
| Klingberg et al. (2018)        | 1 | 0.5 | 1.0 | 1 | 0 | 1 | 1 | 1 | 2 | 1 | 0 | 0 | 0 | <b>9.5</b> |
| Layne et al. (2019)            | 1 | 0.5 | 0.5 | 1 | 1 | 1 | 0 | 1 | 2 | 1 | 0 | 0 | 0 | <b>9</b>   |
| Lewis and Malecha (2011)       | 1 | 1.5 | 0.5 | 1 | 1 | 1 | 0 | 1 | 2 | 1 | 0 | 0 | 0 | <b>10</b>  |
| Minton et al. (2018)           | 1 | 1.5 | 0.5 | 1 | 1 | 1 | 0 | 1 | 2 | 1 | 0 | 0 | 0 | <b>10</b>  |
| Mullan et al. (2013)           | 1 | 1.5 | 1.5 | 1 | 0 | 1 | 0 | 1 | 2 | 1 | 0 | 0 | 0 | <b>10</b>  |
| Nemeth et al. (2017)           | 1 | 0.5 | 0.5 | 1 | 1 | 1 | 0 | 1 | 2 | 1 | 0 | 0 | 0 | <b>9</b>   |
| Rehder et al. (2020)           | 1 | 1.5 | 1.5 | 1 | 1 | 1 | 1 | 1 | 2 | 1 | 0 | 0 | 0 | <b>12</b>  |
| Rosenstein and Naylor (2012)   | 1 | 1.5 | 0.5 | 1 | 0 | 1 | 0 | 1 | 1 | 1 | 0 | 0 | 0 | <b>8</b>   |
| Rosenstein and O'Daniel (2005) | 1 | 1.5 | 0.5 | 1 | 0 | 1 | 0 | 1 | 1 | 1 | 0 | 0 | 0 | <b>8</b>   |
| Rosenstein and O'Daniel (2008) | 1 | 1.5 | 0.5 | 1 | 0 | 1 | 0 | 1 | 0 | 1 | 0 | 0 | 0 | <b>7</b>   |

Additional material, Table 2: details of MERSQI scores

|                           |   |     |     |   |   |   |   |   |   |   |   |   |   |            |
|---------------------------|---|-----|-----|---|---|---|---|---|---|---|---|---|---|------------|
| Ruvalcaba et al. (2018)   | 1 | 1.5 | 0.5 | 1 | 1 | 1 | 0 | 1 | 2 | 1 | 0 | 0 | 0 | <b>10</b>  |
| Sellers et al. (2012)     | 1 | 1.5 | 0.5 | 1 | 1 | 1 | 0 | 1 | 2 | 1 | 0 | 0 | 0 | <b>10</b>  |
| Shetty et al. (2016)      | 1 | 1.5 | 0.5 | 1 | 0 | 1 | 0 | 1 | 2 | 1 | 0 | 0 | 0 | <b>9</b>   |
| Sliter et al. (2014)      | 1 | 1.5 | 0.5 | 1 | 1 | 1 | 1 | 1 | 2 | 1 | 0 | 0 | 0 | <b>11</b>  |
| Small et al. (2015)       | 1 | 1.5 | 0.5 | 1 | 0 | 1 | 0 | 1 | 2 | 1 | 0 | 0 | 0 | <b>9</b>   |
| Smith et al. (2018)       | 1 | 1.5 | 0.5 | 1 | 1 | 1 | 1 | 1 | 2 | 1 | 0 | 0 | 0 | <b>11</b>  |
| Tikva et al. (2019)       | 1 | 1.5 | 0.5 | 1 | 1 | 0 | 1 | 1 | 2 | 1 | 0 | 0 | 0 | <b>10</b>  |
| Veltman (2007)            | 1 | 1.5 | 1.0 | 1 | 0 | 0 | 0 | 1 | 1 | 1 | 0 | 0 | 0 | <b>7.5</b> |
| Villafranca et al. (2019) | 1 | 1.5 | 0.5 | 1 | 1 | 1 | 1 | 1 | 2 | 1 | 0 | 0 | 0 | <b>11</b>  |
| Viotti et al. (2018)      | 1 | 1.5 | 0.5 | 1 | 1 | 1 | 1 | 1 | 2 | 1 | 0 | 0 | 0 | <b>11</b>  |
| Walrath et al. (2013)     | 1 | 0.5 | 0.5 | 1 | 1 | 1 | 0 | 1 | 2 | 1 | 0 | 0 | 0 | <b>9</b>   |
